# Supplementary material
Source: Springer Nature journal article supplement (https://www.springermedizin.de/resource/supplementary/12971_2013_153_MOESM3_ESM.pdf/9595086)

Proportion of students (%)

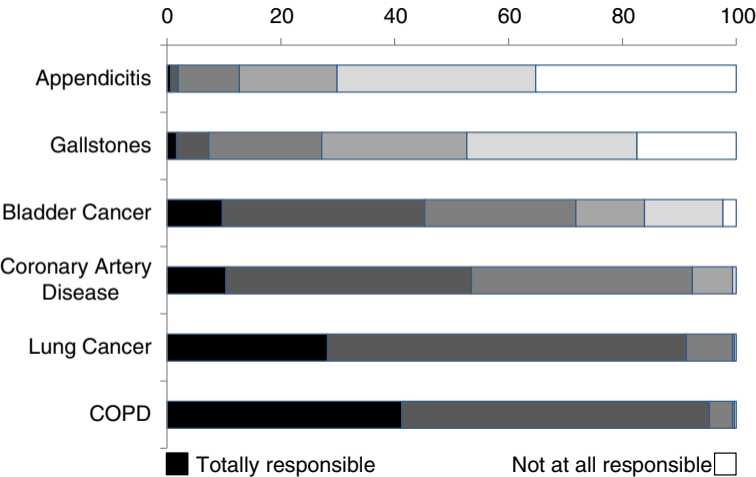

Supplement: MOESM3 [file 9595086]
